# Supplementary material
Source: MDPI journal article supplement (https://www.mdpi.com/2311-7524/10/5/510)
Supplement: s1 [file s1]

**Supplementary Figure S1.** Correlation heat maps of t Pearson correlation for 18 samples. Pearson correlation was calculated using Log2 (FPKM) of expression values. LCK: the leaves of control LNa6h: the leaves under saline-alkali stress at 6 h LNa12h: the leaves under saline-alkali stress at 12 h RCK: the roots of control RNa6h: the roots under saline-alkali stress at 6 h RNa12h: the roots under saline-alkali stress at 12 h

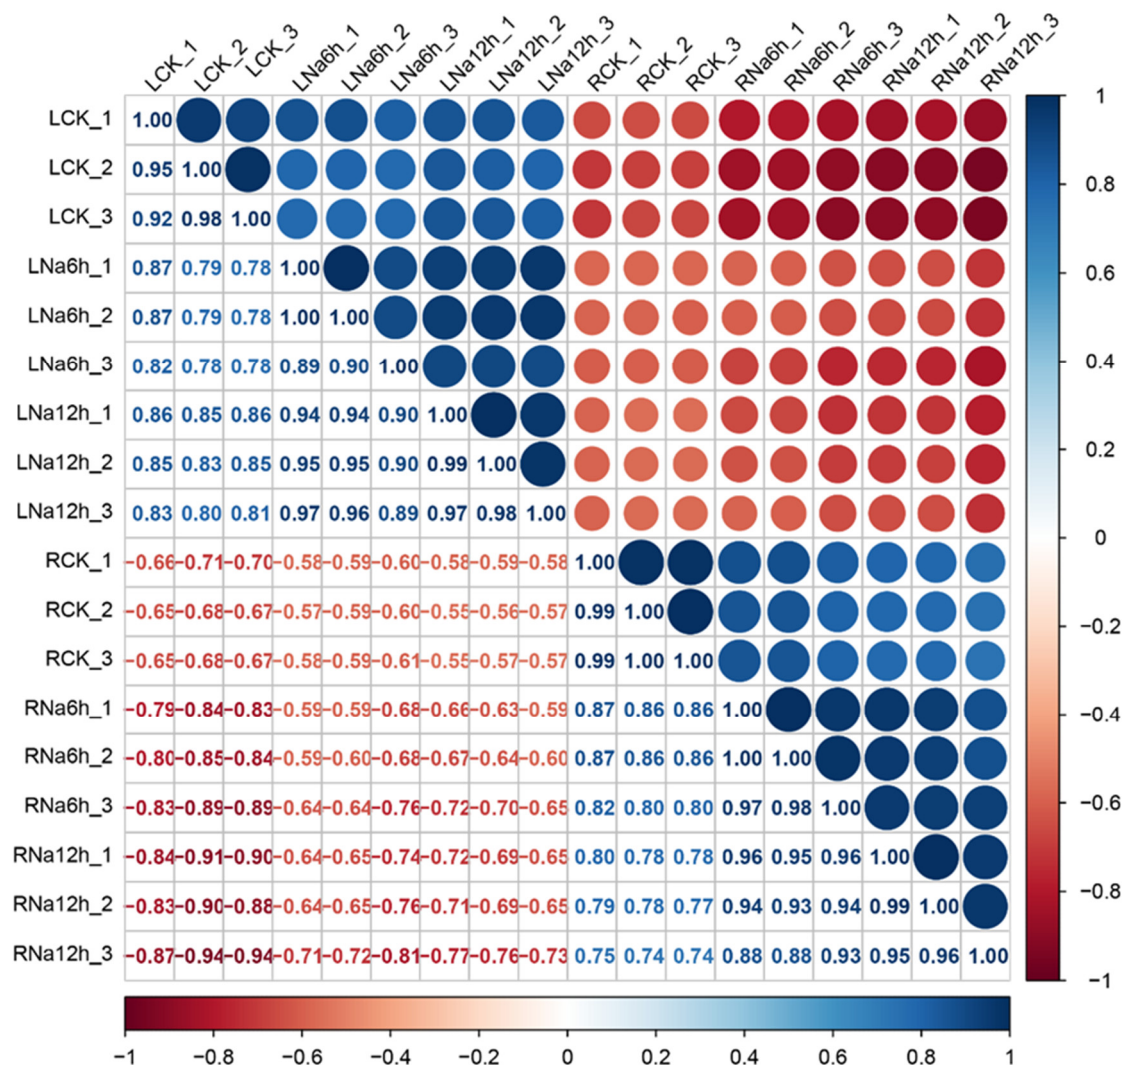

**Supplementary Table S1.** Sample reads quality of 18 libraries

| Sample   | Raw_reads | Raw_bases | Clean_reads | Clean_bases | Error_rate | Q20   | Q30   | GC_pct |
|----------|-----------|-----------|-------------|-------------|------------|-------|-------|--------|
| LCK_1    | 47893940  | 7.18G     | 45173146    | 6.78G       | 0.03       | 97.45 | 92.85 | 47.75  |
| LCK_2    | 47998592  | 7.2G      | 43732092    | 6.56G       | 0.03       | 97.72 | 93.31 | 46.4   |
| LCK_3    | 52162424  | 7.82G     | 49901076    | 7.49G       | 0.03       | 97.35 | 92.48 | 47.84  |
| LNa6h_1  | 45989142  | 6.9G      | 43514088    | 6.53G       | 0.03       | 97.43 | 92.72 | 47.23  |
| LNa6h_2  | 46022154  | 6.9G      | 43203508    | 6.48G       | 0.03       | 97.23 | 92.22 | 47.6   |
| LNa6h_3  | 44850488  | 6.73G     | 41650554    | 6.25G       | 0.03       | 96.71 | 91.04 | 46.43  |
| LNa12h_1 | 44102478  | 6.62G     | 41714000    | 6.26G       | 0.03       | 97.38 | 92.59 | 47.18  |
| LNa12h_2 | 45964412  | 6.89G     | 43417572    | 6.51G       | 0.03       | 97.27 | 92.34 | 47.14  |
| LNa12h_3 | 45002476  | 6.75G     | 41702990    | 6.26G       | 0.03       | 97.63 | 93.18 | 46.7   |
| RCK_1    | 45829908  | 6.87G     | 43426242    | 6.51G       | 0.03       | 97.45 | 92.66 | 45.6   |
| RCK_2    | 50391166  | 7.56G     | 46671834    | 7.0G        | 0.03       | 97.44 | 92.65 | 44.9   |
| RCK_3    | 46468958  | 6.97G     | 43680678    | 6.55G       | 0.03       | 97.1  | 91.94 | 45.71  |
| RNa6h_1  | 45698972  | 6.85G     | 44501112    | 6.68G       | 0.03       | 97.46 | 92.68 | 46.37  |
| RNa6h_2  | 43450222  | 6.52G     | 41848308    | 6.28G       | 0.03       | 97.48 | 92.76 | 45.71  |
| RNa6h_3  | 43843240  | 6.58G     | 41814864    | 6.27G       | 0.03       | 97.64 | 93.12 | 45.49  |
| RNa12h_1 | 43086974  | 6.46G     | 41200432    | 6.18G       | 0.03       | 97.59 | 93.11 | 46.06  |
| RNa12h_2 | 42640688  | 6.4G      | 40659818    | 6.1G        | 0.03       | 97.26 | 92.35 | 46.11  |
| RNa12h_3 | 45594650  | 6.84G     | 43494484    | 6.52G       | 0.03       | 97.47 | 92.81 | 45.58  |

**Supplementary Table S2.** Phenotypic data of 18 samples

| Sample   | SOD activity(U/g) | CAT activity(U/g) | POD activity(U/g) | PPO activity(U/g) | Na+/K+ ratio |
|----------|-------------------|-------------------|-------------------|-------------------|--------------|
| LCK_1    | 59.26             | 13.22             | 530.53            | 15.96             | 0.74         |
| LCK_2    | 61.04             | 12.66             | 431.66            | 14.87             | 0.84         |
| LCK_3    | 61.51             | 11.85             | 506.27            | 15.41             | 0.79         |
| LNa6h_1  | 104.57            | 8.33              | 664.45            | 21.31             | 0.80         |
| LNa6h_2  | 105.35            | 7.64              | 615.80            | 22.71             | 0.70         |
| LNa6h_3  | 109.25            | 8.28              | 723.52            | 19.81             | 0.75         |
| LNa12h_1 | 90.17             | 26.80             | 1317.37           | 19.09             | 1.14         |
| LNa12h_2 | 97.39             | 30.64             | 1577.45           | 20.86             | 1.42         |
| LNa12h_3 | 99.51             | 28.41             | 1518.36           | 19.92             | 1.28         |
| RCK_1    | 49.13             | 22.27             | 615.80            | 32.41             | 2.25         |
| RCK2_    | 53.16             | 25.18             | 612.72            | 42.26             | 2.74         |
| RCK3_    | 54.41             | 27.41             | 689.79            | 31.53             | 2.45         |
| RNa6h_1  | 42.90             | 40.73             | 1677.45           | 106.12            | 6.19         |
| RNa6h_2  | 48.20             | 41.35             | 1648.64           | 125.51            | 6.77         |
| RNa6h_3  | 49.24             | 40.71             | 1647.73           | 87.72             | 5.77         |
| RNa12h_1 | 39.66             | 105.26            | 2966.67           | 78.74             | 9.84         |
| RNa12h_2 | 43.23             | 113.58            | 2992.22           | 66.76             | 9.42         |
| RNa12h_3 | 42.07             | 109.34            | 3037.35           | 77.74             | 9.45         |

**Supplementary Table S3.** Primer sequences for RT-qPCR testing in this study

| Name            | Forward primer            | Reverse primer           |
|-----------------|---------------------------|--------------------------|
| (q)MdPP2C29Like | GCTTGTTGGTTGTGCTAA        | TCAGTTATATCCTCAGTGTTCA   |
| (q)MdCIPK19     | AAGCACATCAAGTTCTACATT     | GTAATCTTTCTTCTGGTCTCAA   |
| (q)MdbHLH80Like | ATCAGTGACCGCATAAGG        | TCATCTAACATATCCGCAGTAT   |
| (q)MdPP2C39     | GGACTATGGAAGGTGATGA       | CCGAAATCTTACGACTATACAG   |
| (q)MdMYB5Like   | ACAGATGGTCACTAATAGCA      | CCTCTTCTTCTTATTGTTCTCAT  |
| (q)MdWRKY31     | TCATTGGCGGATCTTACT        | CATTGGCATTGTTGTTGTT      |
| (q)MdWRKY23     | TTGTTGTGACTACTTATGAAGG    | ACGGCTCTACTTGTTGAT       |
| (q)MdWRKY69     | GCCACTATCACTATCATATTCTC   | AAGATTGTTAGTCCTCCTCAT    |
| (q)MdPHL7Like   | CACTCAAAGCGTCAGATG        | TAGAGGCAGATTAGATGTAGC    |
| (q)MdCML18      | AAGTCTCCAGCCAATTCA        | ATCTCCGTTACGATCCATT      |
| (q)MdWRKY10     | TGCTGATGAACCTAATGC        | CTGTGACCGTCTTATGTG       |
| (q)MdNAC1       | ATATTATGACGGAGACCTCAA     | ATTCATCAACTGCCACATC      |
| (q)MdActin      | TGACCGAATGAGCAAGGAAATTACT | TACTCAGCTTTGGCAATCCACATC |
